# Supplementary material for: Light rare earth element depletion during Deepwater Horizon blowout methanotrophy
Source: PubMed Central journal article supplement (PMC5583346; doi:10.1038/s41598-017-11060-z), 2017-09-04
Supplement: 41598_2017_11060_MOESM1_ESM.pdf [file 41598_2017_11060_MOESM1_ESM.pdf]

# Light rare earth element depletion during *Deepwater Horizon* blowout methanotrophy

**Authors:** A.M. Shiller<sup>1\*</sup>, E.W. Chan<sup>2</sup>, DJ. Joung<sup>1</sup>, M.C. Redmond<sup>3</sup>, J.D. Kessler<sup>2</sup>

<sup>1</sup>Center for Trace Analysis, University of Southern Mississippi, Stennis Space Center, MS 39529, USA.

<sup>2</sup>Earth and Environmental Sciences, University of Rochester, Rochester, NY 14627, USA.

<sup>3</sup>Dept. of Biological Sciences, University of North Carolina at Charlotte, Charlotte, NC 28223, USA.

\*Correspondence to: alan.shiller@usm.edu; 228-688-1178

**Supplementary Information:** Table S1 and Figure S1.

Table S1. Summary of metagenome sequences

| Sample Name         | <b>GOM15B</b> | <b>GOM15C</b> |
|---------------------|---------------|---------------|
| IMG ID              | 3300008252    | 3300008227    |
| Genome Size         | 802,871,420   | 845,437,039   |
| Gene Count          | 1,680,640     | 1,822,033     |
| Scaffold Count      | 1,244,072     | 1,379,518     |
| %GC                 | 42.5          | 41.8          |
| 16S rRNA Gene Count | 1252          | 1304          |
| 16S rRNA Reads      | 268,350       | 290,117       |
| soxB Gene Count     | 125           | 184           |
| soxB Reads          | 10,307        | 11,247        |
| soxA Gene Count     | 46            | 46            |
| soxA Reads          | 12,225        | 11,130        |
| soxA Gene Count     | 220           | 206           |
| soxA Reads          | 13,396        | 15,615        |

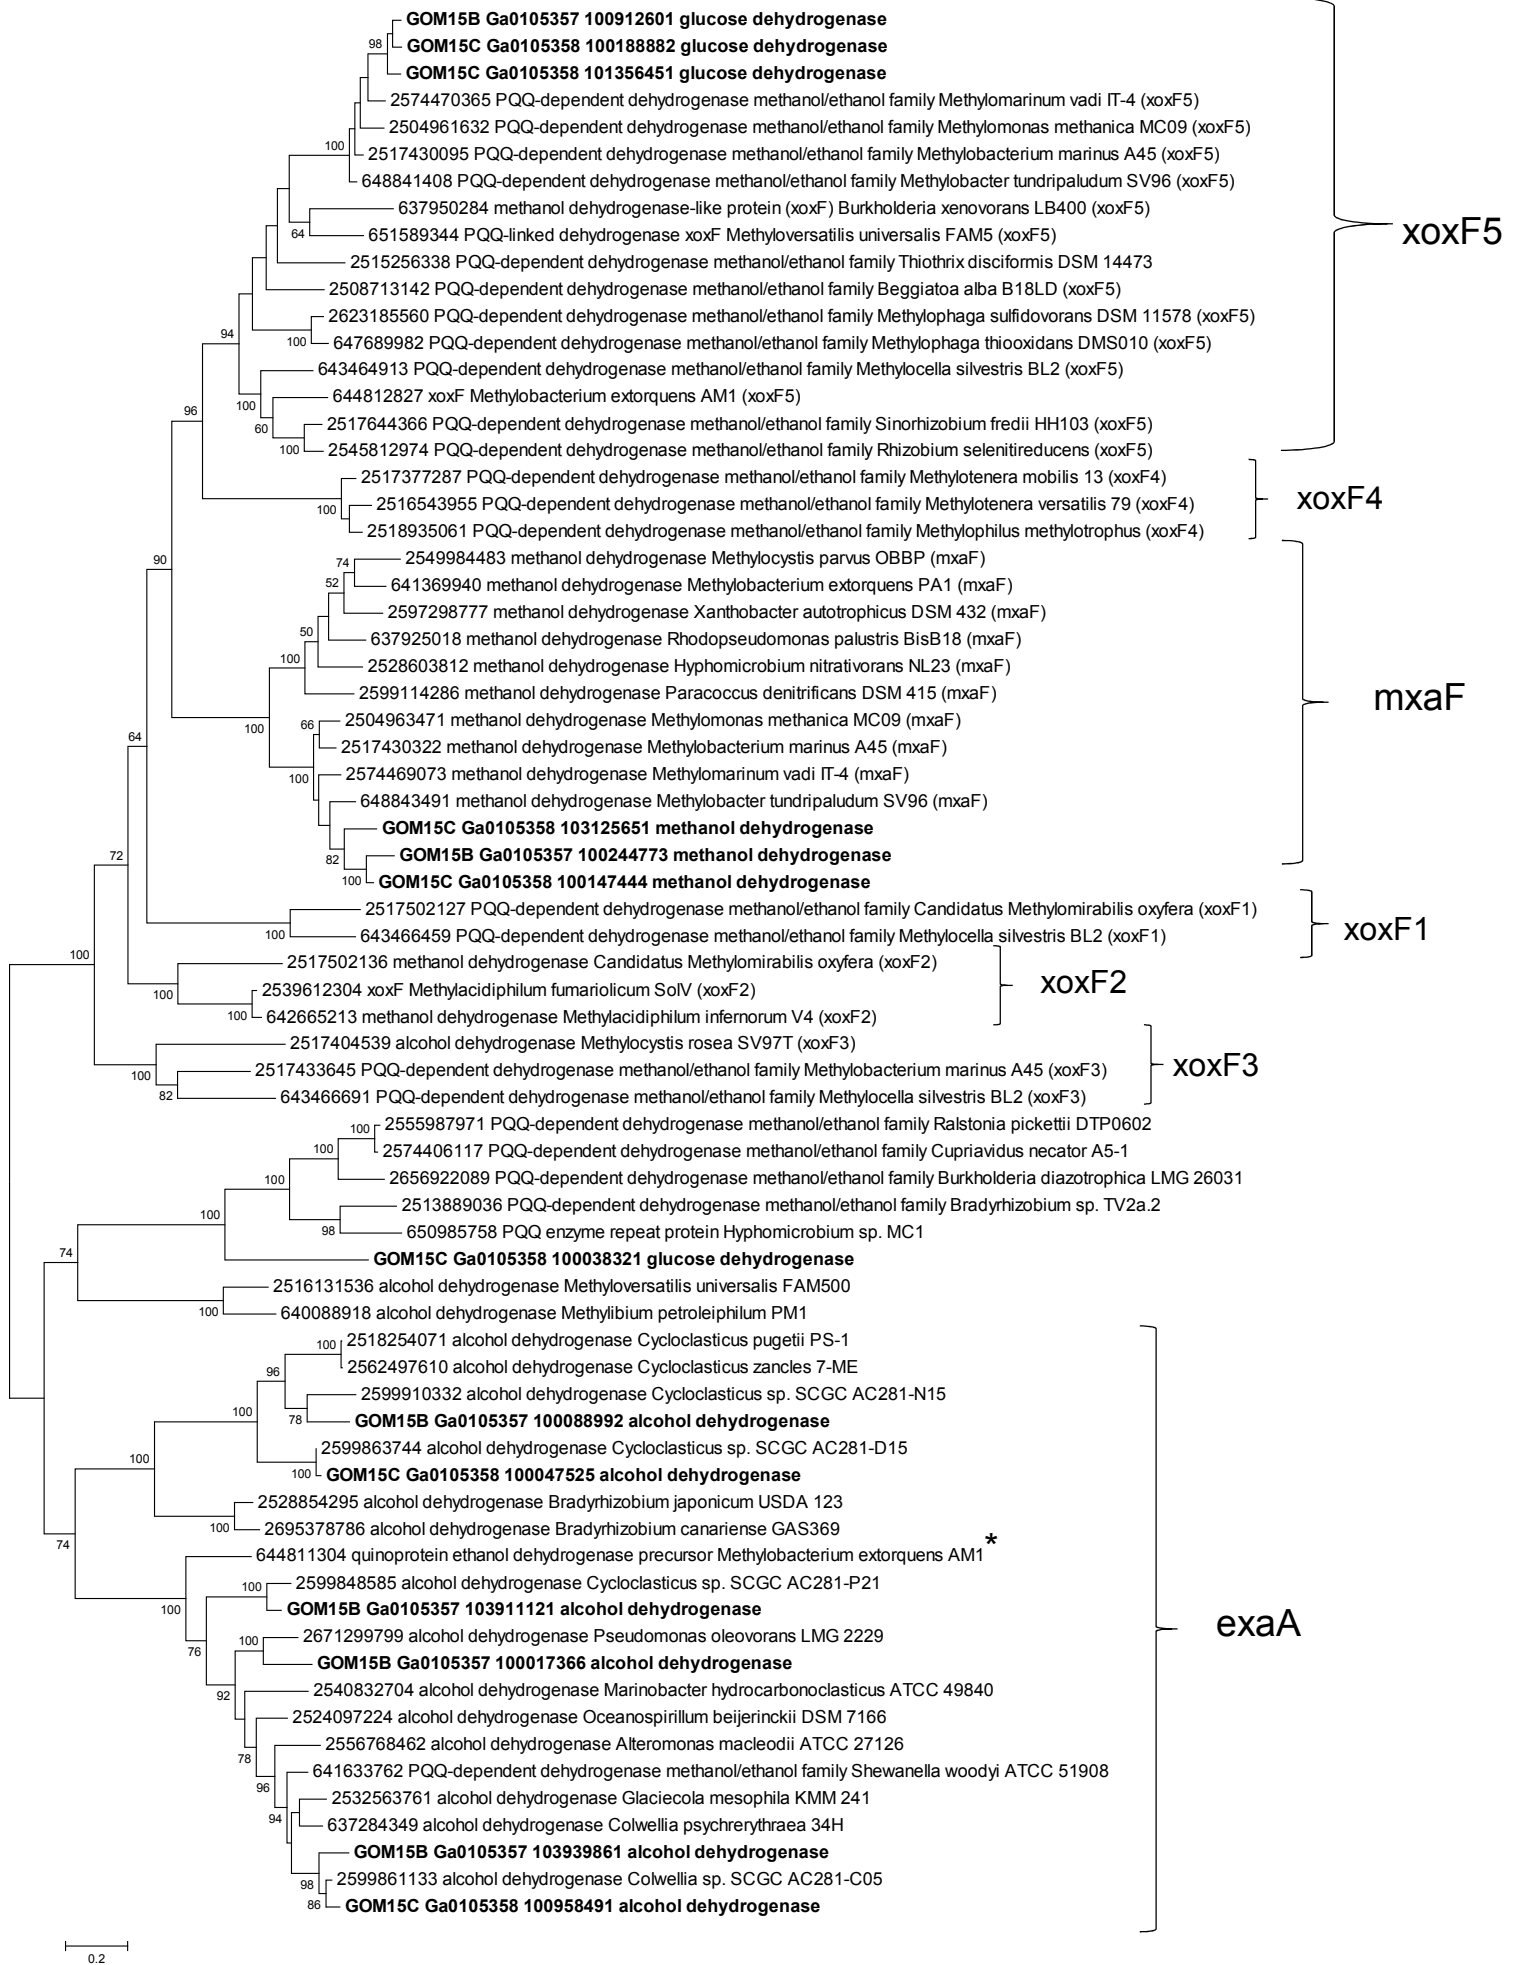

Figure S1: Maximum likelihood tree of *mxαF* and *xoxF* methanol dehydrogenase and *exaA* alcohol dehydrogenase sequences. Selected sequences from incubation metagenomes are indicated in bold and identified by IMG locus tags. La-requiring *exaA* from *Methylobacterium extorquens* AM1 is shown with \*. Reference sequences are shown with IMG gene IDs and annotations. *xoxF* sequences are also classified according to the five clade system used by Keltjens et al. (2014), shown in parentheses. Bootstrap values below 50% are not shown.
